# Supplementary material
Source: ML conference proceedings conference paper supplement (https://www.ecva.net/papers/eccv_2020/papers_ECCV/html/123570052_ECCV_2020_paper.php)
Supplement: Supplementary file 2 [file 123570052-supp.zip]

Archive with 3 entries (3 files):
- 1483-supp.mp4
- 1483-supp.pdf
- README.txt
