# Supplementary material
Source: ML conference proceedings conference paper supplement (https://www.ecva.net/papers/eccv_2020/papers_ECCV/html/123570052_ECCV_2020_paper.php)
Supplement: Supplementary file 2 [file 123570052-supp.zip › README.txt]

The supplementary materials consist of one PDF file and one video. 
The PDF file contains descriptions about the video and more discussions We recomend referring to the PDF while watching the video.
The video is encoded in H.264 codec. 
Please be noted that the quality of the video and audio are compromised due to the limitation of the file size.
